# Supplementary material for: Individual and Joint Effect of Alpha-Tocopherol and Hydroxytyrosol Acetate on the Oxidation of Sunflower Oil Submitted to Oxidative Conditions: A Study by Proton Nuclear Magnetic Resonance
Source: MDPI journal article supplement (doi:10.3390/antiox11061156), 2022-06-13
Supplement: s1 [file s1]

---

## **SUPPLEMENTARY MATERIAL**

### **Individual and Joint Effect of Alpha-Tocopherol and Hydroxytyrosol Acetate on the Oxidation of Sunflower Oil Submitted to Oxidative Conditions: A Study by Proton Nuclear Magnetic Resonance**

Sofía del Caño-Ochoa, Ainhoa Ruiz-Aracama, María D Guillén \*

Food Technology. Faculty of Pharmacy. Lascaray Research Center. University of the  
Basque Country (UPV/EHU). Paseo de la Universidad nº 7, 01006 Vitoria, Spain, Telf:

34-945-013081. E-mail: [mariadolores.guillen@ehu.eus](mailto:mariadolores.guillen@ehu.eus)

---

Table S1. Standard compounds used for identification purposes.

|                                                                                                              |                                                                                                              |
|--------------------------------------------------------------------------------------------------------------|--------------------------------------------------------------------------------------------------------------|
| 2 <i>E</i> -hexenal <sup>a</sup>                                                                             | 2 <i>E</i> -heptenal <sup>a</sup>                                                                            |
| 2 <i>E</i> -decenal <sup>a</sup>                                                                             | 2 <i>E</i> ,4 <i>E</i> -hexadienal <sup>a</sup>                                                              |
| 2 <i>E</i> ,4 <i>E</i> -heptadienal <sup>a</sup>                                                             | 2 <i>E</i> ,4 <i>E</i> -decadienal <sup>a</sup>                                                              |
| 4,5-epoxy-2 <i>E</i> -decenal <sup>a</sup>                                                                   | 12,13-epoxy-9 <i>Z</i> -octadecenoic acid methyl ester (isoleukotoxin methyl ester) <sup>a</sup>             |
| 2-pentylfuran <sup>a</sup>                                                                                   | 2-ethylfuran <sup>a</sup>                                                                                    |
| amylformate <sup>a</sup>                                                                                     | octylfor-mate <sup>a</sup>                                                                                   |
| <i>alpha</i> -tocopherol <sup>a</sup>                                                                        | 9,10-epoxy-12 <i>Z</i> -octadecenoic acid (leukotoxin) <sup>b</sup>                                          |
| 12,13- <i>E</i> -epoxy-9 <i>Z</i> -octadecenoic acid <sup>b</sup>                                            | 4-hydroxy-2 <i>E</i> -nonenal <sup>b</sup>                                                                   |
| 4-hydroperoxy-2 <i>E</i> -nonenal <sup>b</sup>                                                               | 4-oxo-2 <i>E</i> -nonenal <sup>b</sup>                                                                       |
| 9,10-dihydroxy-12 <i>Z</i> -octadecenoic acid (leukotoxin diol) <sup>b</sup>                                 | 12,13-dihydroxy-9 <i>Z</i> -octadecenoic acid (isoleukotoxin diol) <sup>b</sup>                              |
| 9-keto-12,13- <i>E</i> -epoxy-10 <i>E</i> -octadecenoic acid <sup>b</sup>                                    | 9-keto-10 <i>E</i> ,12 <i>E</i> -octadecadienoic acid <sup>b</sup>                                           |
| 9-keto-10 <i>E</i> ,12 <i>Z</i> -octadecadienoic acid <sup>b</sup>                                           | 13-keto-9 <i>Z</i> ,11 <i>E</i> -octadecadienoic acid <sup>b</sup>                                           |
| 12 <i>R</i> -hydroxy-9 <i>Z</i> -octadecenoic acid methyl ester (ricinoleic acid methyl ester) <sup>b</sup>  | 9 <i>S</i> -hydroxy-10 <i>E</i> ,12 <i>E</i> -octadecadienoic acid (Dimorphecolic acid) <sup>c</sup>         |
| methyl 13 <i>S</i> -hydroxy-9 <i>S</i> ,10 <i>R</i> -epoxy-11 <i>E</i> -octadecenoate <sup>c</sup>           | 11 <i>S</i> -hydroxy-9 <i>S</i> ,10 <i>S</i> -epoxy-12 <i>Z</i> -octadecenoic acid methyl ester <sup>c</sup> |
| 13 <i>S</i> -hydroxy-11 <i>S</i> ,12 <i>S</i> -epoxy-9 <i>Z</i> -octadecenoic acid methyl ester <sup>c</sup> | 9-hydroxy-10-keto-12 <i>Z</i> -octadecenoic acid <sup>c</sup>                                                |
| 9,10- <i>Z</i> -12,13- <i>Z</i> -diepoxyoctadecanoic acid <sup>c</sup>                                       | 13-hydroxy-12-keto-9 <i>Z</i> -octadecenoic acid <sup>c</sup>                                                |
| hydroxytyrosol acetate <sup>d</sup>                                                                          |                                                                                                              |

Acquired from: <sup>a</sup> Sigma-Aldrich (St. Louis, MO, USA); <sup>b</sup> Cayman Chemical (Ann Arbor, MI, USA); <sup>c</sup> Larodan (Malmö, Sweeden); <sup>d</sup> Seprox Biotech (Madrid, Spain).

Table S2.  $^1\text{H}$  NMR signals, obtained in  $\text{CDCl}_3$ , of protons of main sunflower oil components, their chemical shifts, multiplicities and assignments to protons of different functional groups present in edible oils.

| Chemical shift<br>(ppm) <sup>a, **</sup> | Multiplicity | Functional group                                           |                                          |
|------------------------------------------|--------------|------------------------------------------------------------|------------------------------------------|
|                                          |              | Type of protons <sup>*</sup>                               | Compound                                 |
| 0.83-0.93                                | t            | $-\text{CH}_3$                                             | Saturated, oleic and linoleic acyl group |
| 1.19-1.42                                | m            | $-(\text{CH}_2)_n-$                                        | Acyl groups                              |
| 1.52-1.70                                | m            | $-\text{OCO}-\text{CH}_2-\text{CH}_2-$                     | Acyl groups                              |
| 1.94-2.14                                | m            | $-\text{CH}_2-\text{CH}=\text{CH}-$                        | Acyl groups                              |
| 2.23-2.36                                | dt           | $-\text{OCO}-\text{CH}_2-$                                 | Acyl groups                              |
| 2.70-2.84                                | t            | $=\text{CH}-\text{CH}_2-\text{CH}=\text{CH}-$              | Acyl groups                              |
| 3.73                                     | $m^b$        | $\text{ROCH}_2-\text{CH}(\text{OR}')-\text{CH}_2\text{OH}$ | 1,2-DG                                   |
| 4.10-4.32                                | dd,dd        | $-\text{CH}_2\text{OCOR}$                                  | Glycerol groups                          |
| 5.20-5.29                                | m            | $-\text{CHOCOR}$                                           | Glycerol groups                          |
| 5.29-5.46                                | m            | $-\text{CH}=\text{CH}-$                                    | Acyl groups                              |

Abbreviations: dd: double doublet; t: triplet; dt: double triplet; m: multiplet.

<sup>\*</sup> Area of the signals due to the protons in bold were used for the quantification of each compound.

<sup>\*\*</sup> The assignment of the  $^1\text{H}$  NMR signals of the protons was made with the aid of standard compounds.

The assignment of the  $^1\text{H}$  NMR signals of the protons of main components was made with the data taken from the literature:

<sup>a</sup> Guillén, M.D.; Ruiz, A. (2003). *Eur. J. Lipid Sci. Tech.* 105(11), 688-696.

<sup>b</sup> This signal shows different multiplicity if the spectrum is acquired from the pure compound or taking part in the mixture.

Table S3. Chemical shift assignments and multiplicities of  $^1\text{H}$  NMR signals in  $\text{CDCl}_3$  of protons of *alpha*-tocopherol and hydroxytyrosol acetate.

| <i>Alpha</i> -tocopherol                                                            |              |                                                 |                              |
|-------------------------------------------------------------------------------------|--------------|-------------------------------------------------|------------------------------|
| 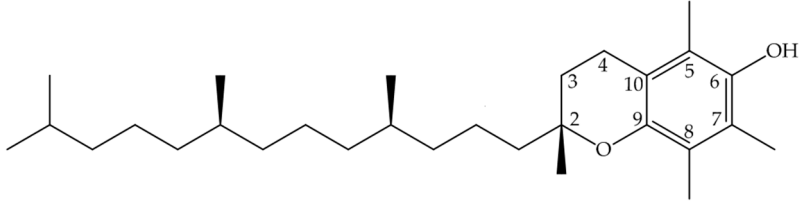  |              |                                                 |                              |
| Chemical shift (ppm) <sup>a, **</sup>                                               | Multiplicity | Functional group                                | Type of protons <sup>*</sup> |
| 4.18                                                                                | s            | Hydroxy group bonded to C6                      | -OH                          |
| <b>2.60</b>                                                                         | t            | Methylene group in position 4                   | -CH <sub>2</sub> -           |
| 2.15                                                                                | s            | Methyl group bonded to C7                       | -CH <sub>3</sub>             |
| 2.11                                                                                | s            | Methyl group bonded to C5 and C8                | -CH <sub>3</sub>             |
| 1.8                                                                                 | m            | Methylene group in position 3                   | -CH <sub>2</sub> -           |
| 1.22                                                                                | s            | Methyl group bonded to C2                       | -CH <sub>3</sub>             |
| 1.1-1.5                                                                             | m            | Chain methylene groups                          | -CH <sub>2</sub> -           |
|                                                                                     |              | Chain methine groups                            | -CH-                         |
| 0.83-0.88                                                                           | m            | Chain methyl groups                             | -CH <sub>3</sub>             |
| Hydroxytyrosol acetate                                                              |              |                                                 |                              |
|  |              |                                                 |                              |
| Chemical shift (ppm) <sup>b, **</sup>                                               | Multiplicity | Functional group (Type of protons) <sup>*</sup> |                              |
| <b>6.71</b>                                                                         | d            | -CH=CH- (H-7 of the dihydroxyphenyl group)      |                              |
| 6.67                                                                                | d            | =CH- (H-4 of the dihydroxyphenyl group)         |                              |
| 6.54                                                                                | dd           | -CH=CH- (H-8 of the dihydroxyphenyl group)      |                              |
| 4.12                                                                                | t            | -CH <sub>2</sub> -OCO-                          |                              |
| 2.73                                                                                | t            | -CH <sub>2</sub> -CH <sub>2</sub> -OCO-         |                              |
| 2.00                                                                                | s            | -OCO-CH <sub>3</sub>                            |                              |

Abbreviations: s: singlet; d: doublet; dd: double doublet; t: triplet; m: multiplet.

<sup>\*</sup> Area of the signals due to the protons in bold, together with the area of the *sn*-1 and *sn*-3 signals of TG shown in Table S1, were used for the quantification of each compound, using the equation [eq. 1] showed in the Materials and Methods.

<sup>\*\*</sup> The assignment of the  $^1\text{H}$  NMR signals of the protons was made with the aid of standard compounds.

The assignment of the  $^1\text{H}$  NMR signals of the protons of *alpha*-tocopherol and hydroxytyrosol acetate was made with the data taken from the literature:

<sup>a</sup> Baker, J.K.; Myers, C.W. (1991). *Pharm. Res.* 8(6), 763-770.

<sup>b</sup> Bouallagui, Z.; Bouaziz, M.; Lassoued, S.; Engasser, J.M.; Ghoul, M.; Sayadi, S. (2011). *Appl. Biochem. Biotechnol.* 163(5), 592-599.

<sup>b</sup> Ammendola, S.; Giusti, A. M.; Masci, A.; Mosca, L.; Saso, L.; Bovicelli, P. (2011). *J. Sci. Ind. Res.* 70(11), 929-937.

Table S4. Chemical shift assignments and multiplicities of  $^1\text{H}$  NMR signals in  $\text{CDCl}_3$  of protons of monohydroperoxy conjugated octadecadienes (mHPO-c-dEs) coming from linoleic groups.

| <b>mHPO-c(Z,E)-dEs</b>                                                                                               |              |                                                                                                   |
|----------------------------------------------------------------------------------------------------------------------|--------------|---------------------------------------------------------------------------------------------------|
| (9-hydroperoxy-10 <i>E</i> ,12 <i>Z</i> -octadecadienoate; 13-hydroperoxy-9 <i>Z</i> ,11 <i>E</i> -octadecadienoate) |              |                                                                                                   |
| Chemical shift<br>(ppm) <sup>a,**</sup>                                                                              | Multiplicity | Functional group (Type of protons) *                                                              |
| <b>6.58</b>                                                                                                          | dddd         | - <b><u>CH</u></b> =CH-CHOOH-                                                                     |
| 6.00                                                                                                                 | ddtd         | -CH= <b><u>CH</u></b> -CH=CH-CHOOH-                                                               |
| 5.56                                                                                                                 | ddm          | -CH= <b><u>CH</u></b> -CHOOH-                                                                     |
| 5.51                                                                                                                 | dtm          | - <b><u>CH</u></b> =CH-CH=CH-CHOOH-                                                               |
| 4.37                                                                                                                 | dtd          | - <b><u>CH</u></b> OOH-                                                                           |
| 2.30                                                                                                                 | t            | -OCO- <b><u>CH</u></b> <sub>2</sub> -                                                             |
| 2.19                                                                                                                 | dtd          | - <b><u>CH</u></b> <sub>2</sub> -CH=CH-                                                           |
| 1.55-1.71                                                                                                            | m            | -CHOOH- <b><u>CH</u></b> <sub>2</sub> -<br>-OCO-CH <sub>2</sub> - <b><u>CH</u></b> <sub>2</sub> - |
| 1.24-1.43                                                                                                            | m            | - <b><u>CH</u></b> <sub>2</sub> -                                                                 |
| 0.89                                                                                                                 | t            | - <b><u>CH</u></b> <sub>3</sub>                                                                   |
| <b>mHPO-c(E,E)-dEs</b>                                                                                               |              |                                                                                                   |
| (9-hydroperoxy-10 <i>E</i> ,12 <i>E</i> -octadecadienoate; 13-hydroperoxy-9 <i>E</i> ,11 <i>E</i> -octadecadienoate) |              |                                                                                                   |
| Chemical shift<br>(ppm) <sup>a,**</sup>                                                                              | Multiplicity | Functional group (Type of protons) *                                                              |
| <b>6.27</b>                                                                                                          | ddm          | - <b><u>CH</u></b> =CH-CHOOH-                                                                     |
| 6.06                                                                                                                 | ddtd         | -CH= <b><u>CH</u></b> -CH=CH-CHOOH-                                                               |
| 5.76                                                                                                                 | dtm          | - <b><u>CH</u></b> =CH-CH=CH-CHOOH-                                                               |
| 5.47                                                                                                                 | ddm          | -CH= <b><u>CH</u></b> -CHOOH-                                                                     |
| 4.32                                                                                                                 | dtd          | - <b><u>CH</u></b> OOH-                                                                           |
| 2.30                                                                                                                 | t            | -OCO- <b><u>CH</u></b> <sub>2</sub> -                                                             |
| 2.09                                                                                                                 | dtd          | - <b><u>CH</u></b> <sub>2</sub> -CH=CH-                                                           |
| 1.42-1.66                                                                                                            | m            | -CHOOH- <b><u>CH</u></b> <sub>2</sub> -<br>-OCO-CH <sub>2</sub> - <b><u>CH</u></b> <sub>2</sub> - |
| 1.25-1.43                                                                                                            | m            | - <b><u>CH</u></b> <sub>2</sub> -                                                                 |
| 0.89                                                                                                                 | t            | - <b><u>CH</u></b> <sub>3</sub>                                                                   |

Abbreviations: dddd: double of double of double doublet; ddtd: double of double of triple doublet; dtd: double of triple doublet; t: triplet; m: multiplet; ddm: double of double multiplet; dtm: double of triple multiplet.

\*Area of the signals due to the protons in bold, together with the area of the *sn*-1 and *sn*-3 signals of TG shown in Table S1, were used for the quantification of each compound, using the equation [eq. 1] showed in the Materials and Methods.

\*\*The assignment of the  $^1\text{H}$  NMR signals of the protons was made with the aid of standard compounds.

The assignment of the  $^1\text{H}$  NMR signals of the protons of mHPO-c-dEs derived from linoleic acyl groups was made with the data taken from the literature:

<sup>a</sup> Goicoechea, E.; Guillén, M.D. (2010). *J. Agric. Food Chem.* 58, 6234-6245.

<sup>a</sup> Pajunen, T.I.; Koskela, H.; Hase, T.; Hopia, A. (2008). *Chem. Phys. Lipids.* 154, 105-114.

Table S5. Chemical shift assignments and multiplicities of  $^1\text{H}$  NMR signals in  $\text{CDCl}_3$  of protons of dihydroperoxy non conjugated *E,E*-octadecadienes (dHPO-nc(*E,E*)-dEs).

| <b>dHPO-nc(<i>E,E</i>)-dEs</b>                                                                                                 |              |                                                                                  |
|--------------------------------------------------------------------------------------------------------------------------------|--------------|----------------------------------------------------------------------------------|
| (9,12-dihydroperoxy-10 <i>E</i> ,13 <i>E</i> -octadecadienoate; 10,13-dihydroperoxy-8 <i>E</i> ,11 <i>E</i> -octadecadienoate) |              |                                                                                  |
| Chemical shift (ppm) <sup>a</sup>                                                                                              | Multiplicity | Functional group (Type of protons) *                                             |
| 5.56-5.87                                                                                                                      | m            | -CHOOH- <u>CH</u> = <u>CH</u> -CHOOH-<br>-CHOOH- <u>CH</u> =CH-CH <sub>2</sub> - |
| 5.36-5.50                                                                                                                      | m            | -CHOOH-CH= <u>CH</u> -CH <sub>2</sub> -                                          |
| <b>4.81</b>                                                                                                                    | dd           | - <u>CH</u> OOH-                                                                 |
| 4.30-4.39                                                                                                                      | m            | -CH <u>OOH</u> -                                                                 |
| 2.33                                                                                                                           | t            | -OCO-CH <sub>2</sub> -                                                           |
| 2.02-2.11                                                                                                                      | m            | -CH=CH-CH <sub>2</sub> -                                                         |
| 1.54-1.69                                                                                                                      | m            | -OCO-CH <sub>2</sub> -CH <sub>2</sub> -                                          |
| 1.16-1.43                                                                                                                      | m            | -CH <sub>2</sub> -                                                               |
| 0.81-0.91                                                                                                                      | t            | -CH <sub>3</sub>                                                                 |

Abbreviations: dd: double doublet; t: triplet; m: multiplet.

\* Area of the signals due to the protons in bold, together with the area of the *sn*-1 and *sn*-3 signals of TG shown in Table S1, were used for the quantification of each compound, using the equation [eq. 1] showed in the Materials and Methods.

The assignment of the  $^1\text{H}$  NMR signals of the protons of dHPO-nc(*E,E*)-dEs was made with the data taken from the literature:

<sup>a</sup> Zhang, W. (2008). Synthesis and Fragmentation Reactions of Linoleic Acid-Derived Hydroperoxides (Doctoral dissertation, Case Western Reserve University).

Table S6. Chemical shift assignments and multiplicities of  $^1\text{H}$  NMR signals in  $\text{CDCl}_3$  of protons of *non vicinal* monohydroperoxy monoepoxy *E*-octadecamonoenes (mHPO-mEPO-*E*-mEs).

| <b>mHPO-<i>E</i>-mEPO-<i>E</i>-mEs</b>                            |              |                                                 |
|-------------------------------------------------------------------|--------------|-------------------------------------------------|
| (9-hydroperoxy-12,13- <i>E</i> -epoxy-10 <i>E</i> -octadecenoate) |              |                                                 |
| Chemical shift (ppm) <sup>a</sup>                                 | Multiplicity | Functional group (Type of protons) <sup>*</sup> |
| <b>5.85</b>                                                       | dd           | -CHOCH-CH=CH-CHOOH-                             |
| 5.47                                                              | dd           | -CHOCH-CH=CH-CHOOH-                             |
| 4.33                                                              | m            | -CHOOH-                                         |
| 3.11                                                              | dd           | -CHOCH-CH=CH-                                   |
| 2.84                                                              | m            | -CHOCH-CH=CH-                                   |
| 2.30                                                              | t            | -OCO-CH <sub>2</sub> -                          |
| 1.51                                                              | m            | -OCO-CH <sub>2</sub> -CH <sub>2</sub> -         |
| 1.31                                                              | m            | -CH <sub>2</sub> -                              |
| 0.89                                                              | t            | -CH <sub>3</sub>                                |
| <b>mHPO-<i>Z</i>-mEPO-<i>E</i>-mEs</b>                            |              |                                                 |
| (13-hydroperoxy-9,10- <i>Z</i> -epoxy-11 <i>E</i> -octadecenoate) |              |                                                 |
| Chemical shift (ppm) <sup>b</sup>                                 | Multiplicity | Functional group (Type of protons) <sup>*</sup> |
| <b>5.84</b>                                                       | dd           | -CHOCH-CH=CH-CHOOH-                             |
| 5.5-5.7                                                           | m            | -CHOCH-CH=CH-CHOOH-                             |
| 4.2-4.4                                                           | m            | -CHOOH-                                         |
| 3.42                                                              | dd           | -CHOCH-CH=CH-                                   |
| 3.0-3.2                                                           | m            | -CHOCH-CH=CH-                                   |
| 2.32                                                              | t            | -OCO-CH <sub>2</sub> -                          |
| 1.1-1.8                                                           | m            | -CH <sub>2</sub> -                              |
| 0.85                                                              | t            | -CH <sub>3</sub>                                |

Abbreviations: dd: double doublet; t: triplet; m: multiplet.

<sup>\*</sup> Area of the signals due to the protons in bold, together with the area of the *sn*-1 and *sn*-3 signals of TG shown in Table S1, were used for the quantification of each compound, using the equation [eq. 1] showed in the Materials and Methods.

The assignment of the  $^1\text{H}$  NMR signals of the protons of mHPO-mEPO-*E*-mEs was made with the data taken from the literature:

<sup>a</sup> Gardner, H.W.; Weisleder, D.; Kleiman, R. (1978). *Lipids*, 13(4), 246-252.

<sup>b</sup> Gu, X.; Salomon, R. (2012). *Free Radical Biol. Med.* 52, 601-606.

Table S7. Chemical shift assignments and multiplicities of  $^1\text{H}$  NMR signals in  $\text{CDCl}_3$  of protons of monohydroxy conjugated *Z,E*-octadecadienes (mHO-c(*Z,E*)-dEs).

| <b>mHO-c(<i>Z,E</i>)-dEs</b><br>(13-hydroxy-9 <i>Z</i> ,11 <i>E</i> -octadecadienoate; 9-hydroxy-10 <i>E</i> ,12 <i>Z</i> -octadecadienoate) |              |                                                  |
|----------------------------------------------------------------------------------------------------------------------------------------------|--------------|--------------------------------------------------|
| Chemical shift<br>(ppm) <sup>a, **</sup>                                                                                                     | Multiplicity | Functional group (Type of protons) <sup>*</sup>  |
| <b>6.46</b>                                                                                                                                  | ddd          | - <b><math>\text{CH}</math></b> =CH-CHOOH-       |
| 5.94                                                                                                                                         | dd           | -CH= <b><math>\text{CH}</math></b> -CH=CH-CHOOH- |
| 5.64                                                                                                                                         | dd           | -CH= <b><math>\text{CH}</math></b> -CHOOH-       |
| 5.42                                                                                                                                         | ddt          | - <b><math>\text{CH}</math></b> =CH-CH=CH-CHOOH- |
| 4.13                                                                                                                                         | m            | - <b><math>\text{CH}</math></b> OH-              |
| 2.27                                                                                                                                         | t            | -OCO- <b><math>\text{CH}_2</math></b> -          |
| 2.15                                                                                                                                         | m            | -CH=CH- <b><math>\text{CH}_2</math></b> -        |
| 1.2-1.7                                                                                                                                      | m            | - <b><math>\text{CH}_2</math></b> -              |
| 0.86                                                                                                                                         | t            | - <b><math>\text{CH}_3</math></b>                |

Abbreviations: dd: double doublet; ddd: double of double doublet; t: triplet; ddt: double of double triplet; m: multiplet.

<sup>\*</sup> Area of the signals due to the protons in bold, together with the area of the *sn*-1 and *sn*-3 signals of TG shown in Table S1, were used for the quantification of each compound, using the equation [eq. 1] showed in the Materials and Methods.

<sup>\*\*</sup> The assignment of the  $^1\text{H}$  NMR signals of the protons was made with the aid of standard compounds.

The assignment of the  $^1\text{H}$  NMR signals of the protons of mHO-c(*Z,E*)-dEs was made with the data taken from the literature:

<sup>a</sup> Kuklev, D. V.; Christie, W. W.; Durand, T.; Rossi, J. C.; Vidal, J. P.; Kasyanov, S. P.;... Bezuglov, V. V. (1997). *Chem. Phys. Lipids*, 85(2), 125-134.



Table S8. Chemical shift assignments and multiplicities of  $^1\text{H}$  NMR signals in  $\text{CDCl}_3$  of protons of monohydroxy monoepoxy *E*-octadecamonoenes (mHO-mEPO-*E*-mEs).

| <b>mHO-<i>E</i>-mEPO-<i>E</i>-mEs</b>                                                                                                     |              |                                                 |
|-------------------------------------------------------------------------------------------------------------------------------------------|--------------|-------------------------------------------------|
| (9-hydroxy-12,13- <i>E</i> -epoxi-10 <i>E</i> -octadecenoate; 13-hydroxy-9,10- <i>E</i> -epoxy-11 <i>E</i> -octadecenoate <sup>**</sup> ) |              |                                                 |
| Chemical shift (ppm) <sup>a</sup>                                                                                                         | Multiplicity | Functional group (Type of protons) <sup>*</sup> |
| <b>5.93</b>                                                                                                                               | dd           | -CH=CH- <b>CH</b> -CHOH-                        |
| 5.41                                                                                                                                      | ddd          | -CH=CH-CHOH-                                    |
| 4.14                                                                                                                                      | m            | -CH-CHOH-                                       |
| 3.09                                                                                                                                      | dd           | -CHOCH-CH=CH-                                   |
| 2.81                                                                                                                                      | dt           | -CH-CHOCH-CH=CH-                                |
| 2.30                                                                                                                                      | t            | -OCO-CH <sub>2</sub> -                          |
| 1.49                                                                                                                                      | m            | -OCO-CH <sub>2</sub> -CH <sub>2</sub> -         |
| 1.31                                                                                                                                      | m            | -CH <sub>2</sub> -                              |
| 0.89                                                                                                                                      | t            | -CH <sub>3</sub>                                |
| <b>mHO-<i>Z</i>-mEPO-<i>E</i>-mEs</b>                                                                                                     |              |                                                 |
| (13-hydroxy-9,10- <i>Z</i> -epoxy-11 <i>E</i> -octadecenoate)                                                                             |              |                                                 |
| Chemical shift (ppm) <sup>b</sup>                                                                                                         | Multiplicity | Functional group (Type of protons) <sup>*</sup> |
| <b>5.95</b>                                                                                                                               | dd           | -CH=CH- <b>CH</b> -CHOH-                        |
| 5.54                                                                                                                                      | ddd          | -CH=CH-CHOH-                                    |
| 3.41                                                                                                                                      | dd           | -CHOCH-CH=CH-                                   |
| 3.07                                                                                                                                      | dt           | -CH-CHOCH-CH=CH-                                |
| 2.30                                                                                                                                      | t            | -OCO-CH <sub>2</sub> -                          |
| 2.10                                                                                                                                      | br           | -CHOH-                                          |
| 1.2-1.6                                                                                                                                   | m            | -CH <sub>2</sub> -                              |
| 0.89                                                                                                                                      | t            | -CH <sub>3</sub>                                |

Abbreviations: dd: double doublet; ddd: double of double doublet; t: triplet; dt: double triplet; m: multiplet; br: broad signal.

<sup>\*</sup> Area of the signals due to the protons in bold, together with the area of the *sn*-1 and *sn*-3 signals of TG shown in Table S1, were used for the quantification of each compound, using the equation [eq. 1] showed in the Materials and Methods.

<sup>\*\*</sup> The assignment of the  $^1\text{H}$  NMR signals of the protons was made with the aid of standard compounds.

The assignment of the  $^1\text{H}$  NMR signals of the protons of mHO-mEPO-*E*-mEs was made with the data taken from the literature:

<sup>a</sup> Gardner, H.W.; Weisleder, D.; Kleiman, R. (1978). *Lipids*, 13(4), 246-252.

<sup>a</sup> Schieberle, P.; Trebert, Y.; Firl, J.; Grosch, W. (1988). *Chem. Phys. Lipids*, 48(3-4), 281-288.

<sup>a</sup> Ramsden, C.E.; Domenichiello, A.F.; Yuan, Z.X.; Sapio, M.R.; Keyes, G.S.; Mishra, S. K.; ... Davis, J.M. (2017). *Sci. Sign.* 10(493), eaa15241.

<sup>b</sup> Hidalgo, F.J.; Zamora, R.; Vioque, E. (1992). *Chem. Phys. Lipids*, 60(3), 225-233.

Table S9. Chemical shift assignments and multiplicities of  $^1\text{H}$  NMR signals in  $\text{CDCl}_3$  of protons of monoketo conjugated octadecadienes (mKO-c-dEs).

| <b>mKO-c(Z,E)-dEs</b>                                              |              |                                                 |
|--------------------------------------------------------------------|--------------|-------------------------------------------------|
| (13-keto-9Z,11E-octadecadienoate; 9-keto-10E,12Z-octadecadienoate) |              |                                                 |
| Chemical shift (ppm) <sup>a, **</sup>                              | Multiplicity | Functional group (Type of protons) <sup>*</sup> |
| <b>7.49</b>                                                        | ddd          | -CO-CH=CH-                                      |
| 6.16                                                               | d            | -CO-CH=CH-                                      |
| 6.12                                                               | dd           | -CO-CH=CH-CH=CH-                                |
| 5.91                                                               | dt           | -CO-CH=CH-CH=CH-                                |
| 2.55                                                               | t            | -CH <sub>2</sub> -CO-                           |
| 2.34                                                               | t            | -OCO-CH <sub>2</sub> -                          |
| 2.30                                                               | m            | -CH=CH-CH <sub>2</sub> -                        |
| 1.32-1.63                                                          | m            | -CH <sub>2</sub> -                              |
| 0.88                                                               | t            | -CH <sub>3</sub>                                |
| <b>mKO-c(E,E)-dEs</b>                                              |              |                                                 |
| (13-keto-9E,11E-octadecadienoate; 9-keto-10E,12E-octadecadienoate) |              |                                                 |
| Chemical shift (ppm) <sup>a, **</sup>                              | Multiplicity | Functional group (Type of protons) <sup>*</sup> |
| <b>7.13</b>                                                        | dm           | -CO-CH=CH-                                      |
| 6.14-6.19                                                          | m            | -CO-CH=CH-CH=CH-                                |
| 6.07                                                               | d            | -CO-CH=CH-                                      |
| 2.53                                                               | t            | -CH <sub>2</sub> -CO-                           |
| 2.35                                                               | t            | -OCO-CH <sub>2</sub> -                          |
| 2.17                                                               | m            | -CH=CH-CH <sub>2</sub> -                        |
| 1.32-1.63                                                          | m            | -CH <sub>2</sub> -                              |
| 0.88                                                               | t            | -CH <sub>3</sub>                                |

Abbreviations: d: doublet; dd: double doublet; ddd; double of double doublet; t: triplet; dt: double triplet; m: multiplet; dm: double multiplet.

<sup>\*</sup> Area of the signals due to the protons in bold, together with the area of the *sn*-1 and *sn*-3 signals of TG shown in Table S1, were used for the quantification of each compound, using the equation [eq. 1] showed in the Materials and Methods.

<sup>\*\*</sup> The assignment of the  $^1\text{H}$  NMR signals of the protons was made with the aid of standard compounds.

The assignment of the  $^1\text{H}$  NMR signals of the protons of mKO-c-dEs was made with the data taken from the literature:

<sup>a</sup> Dufour, C.; Loonis, M. (2005). *Chem. Phys. Lipids*. 138(1), 60-68.

Table S10. Chemical shift assignments and multiplicities of <sup>1</sup>H NMR signals in CDCl<sub>3</sub> of protons of monoketo monoepoxy *E*-octadecamonoenes (mKO-mEPO-*E*-mEs).

| <b><i>non vicinal-mKO-Z-mEPO-E-mEs</i></b>                                                                           |              |                                                 |
|----------------------------------------------------------------------------------------------------------------------|--------------|-------------------------------------------------|
| (13-keto-9,10- <i>Z</i> -epoxy-11 <i>E</i> -octadecenoate; 9-keto-12,13- <i>Z</i> -epoxy-10 <i>E</i> -octadecenoate) |              |                                                 |
| Chemical shift (ppm) <sup>a</sup>                                                                                    | Multiplicity | Functional group (Type of protons) <sup>*</sup> |
| <b>6.66</b>                                                                                                          | dd           | -CO-CH=CH-                                      |
| 6.40                                                                                                                 | d            | -CO-CH=CH-                                      |
| 3.52                                                                                                                 | dd           | -CH=CH-CH <sub>2</sub> OH-                      |
| 3.20                                                                                                                 | dd           | -CH=CH-CH <sub>2</sub> OH-                      |
| 2.55                                                                                                                 | t            | -CH <sub>2</sub> -CO-                           |
| 2.30                                                                                                                 | t            | -OCO-CH <sub>2</sub> -                          |
| 1.2-1.7                                                                                                              | m            | -CH <sub>2</sub> -                              |
| 0.89                                                                                                                 | t            | -CH <sub>3</sub>                                |
| <b><i>non vicinal-mKO-E-mEPO-E-mEs</i></b>                                                                           |              |                                                 |
| (13-keto-9,10- <i>E</i> -epoxy-11 <i>E</i> -octadecenoate; 9-keto-12,13- <i>E</i> -epoxy-10 <i>E</i> -octadecenoate) |              |                                                 |
| Chemical shift (ppm) <sup>a,**</sup>                                                                                 | Multiplicity | Functional group (Type of protons) <sup>*</sup> |
| 6.52                                                                                                                 | dd           | -CO-CH=CH-                                      |
| 6.38                                                                                                                 | d            | -CO-CH=CH-                                      |
| <b>3.21</b>                                                                                                          | dd           | -CH=CH-CH <sub>2</sub> OH-                      |
| 2.89                                                                                                                 | td           | -CH=CH-CH <sub>2</sub> OH-                      |
| 2.53                                                                                                                 | t            | -CH <sub>2</sub> -CO-                           |
| 2.30                                                                                                                 | t            | -OCO-CH <sub>2</sub> -                          |
| 1.2-1.6                                                                                                              | m            | -CH <sub>2</sub> -                              |
| 0.86                                                                                                                 | t            | -CH <sub>3</sub>                                |
| <b><i>vicinal-mKO-E-mEPO-E-mEs</i></b>                                                                               |              |                                                 |
| (11-keto-12,13- <i>E</i> -epoxy-9 <i>E</i> -octadecenoate; 11-keto-9,10- <i>E</i> -epoxy-12 <i>E</i> -octadecenoate) |              |                                                 |
| Chemical shift (ppm) <sup>b</sup>                                                                                    | Multiplicity | Functional group (Type of protons) <sup>*</sup> |
| <b>7.02</b>                                                                                                          | dt           | -CO-CH=CH-                                      |
| 6.16-6.23                                                                                                            | dt           | -CO-CH=CH-                                      |
| 3.28-3.34                                                                                                            | d            | -CHOCH <sub>2</sub> -CO-                        |
| 2.98-3.04                                                                                                            | ddd          | -CHOCH <sub>2</sub> -CO-                        |
| 2.29-2.34                                                                                                            | t            | -OCO-CH <sub>2</sub> -                          |
| 2.16-2.22                                                                                                            | dtd          | -CH=CH-CH <sub>2</sub> -                        |
| 1.25-1.70                                                                                                            | m            | -CH <sub>2</sub> -                              |
| 0.82-0.89                                                                                                            | t            | -CH <sub>3</sub>                                |

Abbreviations: d: doublet; dd: double doublet; td: triple doublet; ddd: double of double doublet; dtd: double of triple doublet; t: triplet; dt: double triplet; m: multiplet.

<sup>\*</sup> Area of the signals due to the protons in bold, together with the area of the *sn*-1 and *sn*-3 signals of TG shown in Table S1, were used for the quantification of each compound, using the equation [eq. 1] showed in the Materials and Methods.

<sup>\*\*</sup> The assignment of the <sup>1</sup>H NMR signals of the protons was made with the aid of standard compounds.

The assignment of the <sup>1</sup>H NMR signals of the protons of mKO-mEPO-*E*-mEs was made with the data taken from the literature:

<sup>a</sup> Hidalgo, F.J.; Zamora, R.; Vioque, E. (1992). *Chem. Phys. Lipids*. 60(3), 225-233.

<sup>a,b</sup> Lin, D.; Zhang, J.; Sayre, L.M. (2007). *J. Org. Chem.* 72(25), 9471-9480.

<sup>a</sup> Ramsden, C.E.; Domenichiello, A.F.; Yuan, Z.X.; Sapio, M.R.; Keyes, G.S.; Mishra, S.K.; Gross, J.R.; Majchrzak-Hong, S.; Zamora, D.; Horowitz, M. S.; et al. (2017). *Sci. Sign.*, 10(493), eaal5241.

<sup>a</sup> Gardner, H.W.; Kleiman, R.; Weisleder, D. (1974). *Lipids*, 9 (9), 696-706.

Table S11. Chemical shift assignments and multiplicities of  $^1\text{H}$  NMR signals in  $\text{CDCl}_3$  of protons of different types of aldehydes.

| <b><i>n</i>-alkanals</b>                       |              |                                          |
|------------------------------------------------|--------------|------------------------------------------|
| Chemical shift<br>(ppm) <sup>a,**</sup>        | Multiplicity | Functional group (Type of protons) *     |
| <b>9.75</b>                                    | t            | - <b><u>C</u>H</b> O                     |
| 2.40                                           | dt           | CHO-CH- <b><u>C</u>H</b> -               |
| 1.61                                           | m            | CHO-CH <sub>2</sub> - <b><u>C</u>H</b> - |
| 1.27-1.32                                      | br           | - <b><u>C</u>H</b> -                     |
| 0.88                                           | t            | - <b><u>C</u>H</b> <sub>3</sub>          |
| <b><i>2E</i>-alkenals</b>                      |              |                                          |
| Chemical shift<br>(ppm) <sup>a,**</sup>        | Multiplicity | Functional group (Type of protons) *     |
| <b>9.49</b>                                    | d            | - <b><u>C</u>H</b> O                     |
| 6.85                                           | tt           | CHO-CH=CH-                               |
| 6.11                                           | dd           | CHO-CH=CH-                               |
| 2.32                                           | q            | -CH=CH- <b><u>C</u>H</b> -               |
| 1.69-1.19                                      | br           | - <b><u>C</u>H</b> -                     |
| 0.89                                           | t            | - <b><u>C</u>H</b> <sub>3</sub>          |
| <b><i>2E,4E</i>-alkadienals</b>                |              |                                          |
| Chemical shift<br>(ppm) <sup>a,**</sup>        | Multiplicity | Functional group (Type of protons) *     |
| <b>9.53</b>                                    | d            | - <b><u>C</u>H</b> O                     |
| 7.09                                           | m            | CHO-CH=CH-                               |
| 6.30                                           | m            | -CH=CH-                                  |
| 6.08                                           | dd           | CHO-CH=CH-                               |
| 2.22                                           | m            | -CH=CH- <b><u>C</u>H</b> -               |
| 1.30-1.47                                      | m            | - <b><u>C</u>H</b> -                     |
| 0.90                                           | t            | - <b><u>C</u>H</b> <sub>3</sub>          |
| <b><i>4,5</i>-epoxy-<i>2E</i>-alkenals</b>     |              |                                          |
| Chemical shift<br>(ppm) <sup>a,**</sup>        | Multiplicity | Functional group (Type of protons) *     |
| <b>9.54</b>                                    | d            | - <b><u>C</u>H</b> O                     |
| 6.56                                           | dd           | CHO-CH=CH-                               |
| 6.40                                           | dd           | CHO-CH=CH-                               |
| 3.33                                           | dd           | - <b><u>C</u>H</b> OCH-                  |
| 2.96                                           | td           | - <b><u>C</u>H</b> OCH-                  |
| 1.33-1.65                                      | m            | - <b><u>C</u>H</b> -                     |
| 0.91                                           | t            | - <b><u>C</u>H</b> <sub>3</sub>          |
| <b><i>4</i>-hydroperoxy-<i>2E</i>-alkenals</b> |              |                                          |
| Chemical shift<br>(ppm) <sup>a,**</sup>        | Multiplicity | Functional group (Type of protons) *     |

|             |    |                    |
|-------------|----|--------------------|
| <b>9.58</b> | d  | - <b>CHO</b>       |
| 8.20        | d  | -OOH               |
| 6.80        | dd | CHO-CH=CH-         |
| 6.33        | m  | CHO-CH=CH-         |
| 4.66        | dd | -CHOH-             |
| 1.21-1.73   | m  | -CH <sub>2</sub> - |
| 0.89        | t  | -CH <sub>3</sub>   |

#### 4-hydroxy-2E-alkenals

| Chemical shift (ppm) <sup>a,**</sup> | Multiplicity | Functional group (Type of protons) <sup>*</sup> |
|--------------------------------------|--------------|-------------------------------------------------|
| <b>9.57</b>                          | d            | - <b>CHO</b>                                    |
| 6.84                                 | dd           | CHO-CH=CH-                                      |
| 6.33                                 | dddd         | CHO-CH=CH-                                      |
| 4.43                                 | m            | -CHOH-                                          |
| 1.30-1.70                            | m            | -CH <sub>2</sub> -                              |
| 0.90                                 | t            | -CH <sub>3</sub>                                |

#### 2Z-alkenals

| Chemical shift (ppm) <sup>b</sup> | Multiplicity | Functional group (Type of protons) <sup>*</sup> |
|-----------------------------------|--------------|-------------------------------------------------|
| <b>10.06</b>                      | d            | - <b>CHO</b>                                    |

Abbreviations: d: doublet; dd: double doublet; td: triple doublet; t: triplet; tt: triple triplet; q: quadruplet; m: multiplet; br: broad signal.

<sup>\*</sup> Area of the signals due to the protons in bold, together with the area of the *sn*-1 and *sn*-3 signals of TG shown in Table S1, were used for the quantification of each compound, using the equation [eq. 1] showed in the Materials and Methods.

<sup>\*\*</sup> The assignment of the <sup>1</sup>H NMR signals of the protons was made with the aid of standard compounds.

The assignment of the <sup>1</sup>H NMR signals of the protons of aldehydes was made with the data taken from the literature:

<sup>a</sup> Guillén, M.D.; Ruiz, A. (2004). *Eur. J. Lipid Sci. Tech.* 106(10), 680-687.

<sup>a</sup> Guillén, M.D.; Ruiz, A. (2005a). *Eur. J. Lipid Sci. Tech.* 107(1), 36-47.

<sup>a</sup> Guillén, M.D. ; Ruiz, A. (2005b). *J. Sci. Food Agric.* 85(14), 2413-2420.

<sup>a</sup> Goicoechea, E.; Guillen, M.D. (2010). *J. Agric. Food Chem.* 58(10), 6234-6245.

<sup>b</sup> Moumtaz, S.; Percival, B.C.; Parmar, D.; Grootveld, K.L.; Jansson, P.; Grootveld, M. (2019). *Sci. Rep.* 9, 1-21.

Table S12. Chemical shift assignments and multiplicities of  $^1\text{H}$  NMR signals in  $\text{CDCl}_3$  of protons of furan groups.

| Alkyl-furans                                |              |                                      |
|---------------------------------------------|--------------|--------------------------------------|
| Chemical shift (ppm) **                     | Multiplicity | Functional group (Type of protons) * |
| 7.27                                        | dd           | $-\text{CH}=\text{CH}-$ (ar. C-4)    |
| 6.24                                        | dd           | $-\text{CH}=\text{CH}-$ (ar. C-3)    |
| 5.94                                        | m            | $-\text{CH}-$ (ar. C-5)              |
| Alkyl furanones (5-pentyl-(5H)-furan-2-one) |              |                                      |
| Chemical shift (ppm) <sup>a</sup>           | Multiplicity | Functional group (Type of protons) * |
| <b>7.46</b>                                 | dd           | $-\text{CH}=\text{CH}-$ (ar. C-4)    |
| 6.10                                        | dd           | $-\text{CH}=\text{CH}-$ (ar. C-3)    |
| 5.04                                        | m            | $-\text{CH}-$ (ar. C-5)              |
| 1.26-2.80                                   | m            | $-\text{CH}_2-$                      |
| 0.90                                        | t            | $-\text{CH}_3$                       |

Abbreviations: dd: double doublet; t: triplet; m: multiplet.

\* Area of the signals due to the protons in bold, together with the area of the *sn*-1 and *sn*-3 signals of TG shown in Table S1, were used for the quantification of each compound, using the equation [eq. 1] showed in the Materials and Methods.

\*\* The assignment of the  $^1\text{H}$  NMR signals of the protons was made with the aid of standard compounds.

The assignment of the  $^1\text{H}$  NMR signals of the protons of 5-pentyl-(5H)-furan-2-one was made with the data taken from the literature:

<sup>a</sup> Bonete, P.; Najera, C. (1994). *J. Org. Chem.* 59(11), 3202-3209.

<sup>a</sup> Braukmüller, S.; Brückner, R. (2006). *Eur. J. Org. Chem.* 2006(9), 2110-2118.

Table S13. Chemical shift assignments and multiplicities of  $^1\text{H}$  NMR signals in  $\text{CDCl}_3$  of protons of epoxy derivatives coming from linoleic acyl groups.

| <b>Z epoxides coming from linoleic acyl groups</b><br>(Mono-epoxides) |              |                                                 |
|-----------------------------------------------------------------------|--------------|-------------------------------------------------|
| Chemical shift<br>(ppm) <sup>a,b, **</sup>                            | Multiplicity | Functional group (Type of protons) <sup>*</sup> |
| 5.50-5.60                                                             | m            | -CHOCH-CH <sub>2</sub> -CH=CH-                  |
| 5.35-5.50                                                             | m            | -CHOCH-CH <sub>2</sub> -CH=CH-                  |
| <b>2.95</b>                                                           | m            | - <b>CHOCH</b> -CH <sub>2</sub> -CH=CH-         |
| 2.20-2.40                                                             | m            | -CHOCH-CH <sub>2</sub> -CH=CH-                  |
| 1.45-1.60                                                             | m            | -CH <sub>2</sub> -CH <sub>2</sub> -CHOCH-       |
| 0.87                                                                  | t            | -CH <sub>3</sub>                                |
| <b>Z epoxides coming from linoleic acyl groups</b><br>(Di-epoxides)   |              |                                                 |
| Chemical shift<br>(ppm) <sup>a, b, **</sup>                           | Multiplicity | Functional group (Type of protons) <sup>*</sup> |
| 3.09-3.14                                                             | m            | -CHOCH-CH <sub>2</sub> -CHOCH-                  |
| 3.00                                                                  | m            | -CHOCH-CH <sub>2</sub> -CHOCH-                  |
| 1.70-1.85                                                             | m            | -CHOCH-CH <sub>2</sub> -CHOCH-                  |
| 1.45-1.60                                                             | m            | -CH <sub>2</sub> -CH <sub>2</sub> -CHOCH-       |
| 0.87                                                                  | t            | -CH <sub>3</sub>                                |
| <b>E epoxides coming from linoleic acyl groups</b><br>(Mono-epoxides) |              |                                                 |
| Chemical shift<br>(ppm) <sup>a, **</sup>                              | Multiplicity | Functional group (Type of protons) <sup>*</sup> |
| 5.47-5.56                                                             | m            | -CHOCH-CH <sub>2</sub> -CH=CH-                  |
| 5.33-5.42                                                             | m            | -CHOCH-CH <sub>2</sub> -CH=CH-                  |
| <b>2.66-2.71</b>                                                      | m            | - <b>CHOCH</b> -                                |
| 2.35-2.44                                                             | m            | -CHOCH-CH <sub>2</sub> -CH=CH-                  |
| 1.26-1.66                                                             | m            | -CH <sub>2</sub> -                              |
| 0.87                                                                  | t            | -CH <sub>3</sub>                                |

Abbreviations: t: triplet; m: multiplet.

<sup>\*</sup> Area of the signals due to the protons in bold, together with the area of the *sn*-1 and *sn*-3 signals of TG shown in Table S1, were used for the quantification of each compound, using the equation [eq. 1] showed in the Materials and Methods.

<sup>\*\*</sup> The assignment of the  $^1\text{H}$  NMR signals of the protons was made with the aid of standard compounds.

The assignment of the  $^1\text{H}$  NMR signals of the protons of epoxides derived from linoleic acyl groups was made with the data taken from the literature:

<sup>a</sup> Nilewski, C.; Chapelain, C.L.; Wolfrum, S.; Carreira, E.M. (2015). *Org. Lett.* 17(22), 5602-5605.

<sup>b</sup> Xia, W.; Budge, S.M.; Lumsden, M.D. (2016). *J. Am. Oil. Chem. Soc.* 93, 467-478.



Table S14. Chemical shift assignments and multiplicities of  $^1\text{H}$  NMR signals in  $\text{CDCl}_3$  of protons of different types of dihydroxy groups (dHO).

| <b>dHO</b><br>(9,10-dihydroxy-12Z-octadecanoate) |              |                                                     |
|--------------------------------------------------|--------------|-----------------------------------------------------|
| Chemical shift<br>(ppm) <sup>a,**</sup>          | Multiplicity | Functional group (Type of protons) <sup>*</sup>     |
| 5.52                                             | m            | -CH=CH-CH <sub>2</sub> -CHOH-CHOH-                  |
| 5.42                                             | m            | -CH=CH-CH <sub>2</sub> -CHOH-CHOH-                  |
| <b>3.42</b>                                      | br           | -CH <sub>2</sub> OH-CH <sub>2</sub> OH-             |
| 2.62                                             | br           | -CHOH-CHOH-                                         |
| 2.27                                             | t            | -OCO-CH <sub>2</sub> -                              |
| 2.25                                             | q            | -CH=CH-CH <sub>2</sub> -CHOH-CHOH-                  |
| 2.02                                             | q            | -CH <sub>2</sub> -CH=CH-CH <sub>2</sub> -CHOH-CHOH- |
| 1.28-1.60                                        | br           | -CH <sub>2</sub> -                                  |
| 0.87                                             | t            | -CH <sub>3</sub>                                    |

Abbreviations: t: triplet; q:quadruplet; m: multiplet; br: broad signal.

<sup>\*</sup> Area of the signals due to the protons in bold, together with the area of the *sn*-1 and *sn*-3 signals of TG shown in Table S1, were used for the quantification of each compound, using the equation [eq. 1] showed in the Materials and Methods.

<sup>\*\*</sup> The assignment of the  $^1\text{H}$  NMR signals of the protons was made with the aid of standard compounds.

The assignment of the  $^1\text{H}$  NMR signals of the protons of dHO was made with the data taken from the literature:

<sup>a</sup> Nilewski, C.; Chapelain, C.L.; Wolfrum, S.; Carreira, E.M. (2015). *Org. Lett.* 17(22), 5602-5605.

<sup>a</sup> Yang, J.; Morton, M.D.; Hill, D.W.; Grant, D.F. (2006). *Chem. Phys. Lipids.* 140 (1-2), 75-87.

Table S15. Chemical shift assignments and multiplicities of  $^1\text{H}$  NMR signals in  $\text{CDCl}_3$  of protons of formic acid and formates.

| Formic acid                       |              |                                             |
|-----------------------------------|--------------|---------------------------------------------|
| Chemical shift (ppm) <sup>a</sup> | Multiplicity | Functional group (Type of protons) *        |
| <b>8.01</b>                       | s            | <b><u>H</u></b> -COOH                       |
| Formates or polyformates          |              |                                             |
| Chemical shift (ppm) <sup>b</sup> | Multiplicity | Functional group (Type of protons) *        |
| <b>8.05-8.20</b>                  | m            | -CH <sub>2</sub> -CH-O <b><u>C</u></b> H=O- |
| 2.3                               | t            | -OCO- <b><u>C</u></b> H <sub>2</sub> -      |
| 2.05                              | s            | -CH <sub>2</sub> -CH-OCH=O-                 |
| 1.3-1.5                           | m            | - <b><u>C</u></b> H <sub>2</sub> -          |
| 0.9                               | t            | - <b><u>C</u></b> H <sub>3</sub>            |

Abbreviations: s: singlet; t: triplet; m: multiplet.

\* Area of the signals due to the protons in bold, together with the area of the *sn*-1 and *sn*-3 signals of TG shown in Table S1, were used for the quantification of each compound, using the equation [eq. 1] showed in the Materials and Methods.

The assignment of the  $^1\text{H}$  NMR signals of the protons of formic acid and formates was made with the data taken from the literature:

<sup>a</sup> Babij, N. R.; McCusker, E. O.; Whiteker, G. T.; Canturk, B.; Choy, N.; Creemer, L. C.; ... Li, F. (2016). *Org. Process Res. Dev.* 20(3), 661-667.

<sup>b</sup> Harry-O'kuru, R.E.; Biresaw, G.; Tisserat, B.; Evangelista, R. (2016). *J. Lipids*, ID 3128604, 12.
